# Supplementary material
Source: ML conference proceedings conference paper supplement (https://proceedings.mlr.press/v37/eggeling15.html)
Supplement: Supplementary file [file eggeling15-supp.pdf]

Dealing with Small Data:  
On the Generalization of Context Trees  
– Supplementary Material –

Ralf Eggeling, Mikko Koivisto, Ivo Grosse

## Contents

|          |                                                     |          |
|----------|-----------------------------------------------------|----------|
| <b>1</b> | <b>Proof of Theorem 1</b>                           | <b>2</b> |
| <b>2</b> | <b>Complete running time results</b>                | <b>3</b> |
| 2.1      | PCT . . . . .                                       | 4        |
| 2.2      | 2-GCT . . . . .                                     | 5        |
| 2.3      | 2 <sup>+</sup> -GCT . . . . .                       | 6        |
| <b>3</b> | <b>Complete memoization results on protein data</b> | <b>7</b> |
| 3.1      | PCT . . . . .                                       | 7        |
| 3.2      | 2-GCT . . . . .                                     | 8        |
| 3.3      | 2 <sup>+</sup> -GCT . . . . .                       | 8        |
| <b>4</b> | <b>Complete prediction results</b>                  | <b>9</b> |

# 1 Proof of Theorem 1

**Theorem 1.** *The expected number of data subsets matched by  $k$ -contexts of length  $\ell$  is at most*

$$\binom{n}{r_k - 1}_* + \binom{n}{r_k} \left(1 + \left(\frac{k}{\sigma}\right)^\ell\right)^n,$$

where  $r_k = \lceil \ln \binom{\sigma}{k} / \ln \frac{\sigma}{k} \rceil \leq \left\lceil k \left(1 + \frac{1}{\ln \frac{\sigma}{k}}\right) \right\rceil$ .

*Proof.* For each nonempty data subset  $S$ , let  $X_S$  be 1 if  $S$  is matched by at least one  $k$ -context of length  $\ell$ , and 0 otherwise. We show that the expectation  $\mathbb{E}[\sum_S X_S]$  has the claimed upper bound.

Using linearity of expectation and the assumption that the data are uniformly distributed, we write  $\mathbb{E}[\sum_S X_S]$  as  $\sum_{i=1}^n \binom{n}{i} p_{i,\ell}$ , where  $p_{i,\ell}$  is the probability that  $X_S = 1$  given that  $|S| = i$ .

We next give an upper bound for each  $p_{i,\ell}$ . To this end, let  $x_1, \dots, x_i \in \Sigma$  be the (random) content of a data subset  $S$  of size  $i$  in a fixed position  $j$ . We say that  $(x_1, \dots, x_i)$  is *covered* by a node  $C_j \subseteq \Sigma$  if  $\{x_1, \dots, x_i\} \subseteq C_j$  and  $|C_j| \leq k$ . Let  $p_i$  be the probability that  $(x_1, \dots, x_i)$  is covered by at least one node  $C_j$ . Note that the probability is clearly the same for all positions  $j$ , and that  $p_{i,\ell} = p_i^\ell$ . By the union bound we have that  $p_i \leq \binom{\sigma}{k} (k/\sigma)^i$ . This bound is at most 1 for  $i \geq r_k$ . For  $i < r_k$  we may use the trivial bound  $p_i \leq 1$ .

We get

$$\mathbb{E}\left[\sum_S X_S\right] = \sum_{i=1}^n \binom{n}{i} p_i^\ell \leq \binom{n}{r_k - 1}_* + \sum_{i=r_k}^n \binom{n}{i} \left(\binom{\sigma}{k} \left(\frac{k}{\sigma}\right)^i\right)^\ell.$$

It remains to bound the latter term as follows:

$$\sum_{i=r_k}^n \binom{n}{i} \left(\binom{\sigma}{k} \left(\frac{k}{\sigma}\right)^i\right)^\ell = \sum_{i=0}^{n-r_k} \binom{n}{r_k + i} \left(\binom{\sigma}{k} \left(\frac{k}{\sigma}\right)^{r_k + i}\right)^\ell \quad (1)$$

$$\leq \sum_{i=0}^{n-r_k} \binom{n}{r_k} \binom{n-r_k}{i} \left(\left(\frac{k}{\sigma}\right)^i\right)^\ell \quad (2)$$

$$= \binom{n}{r_k} \left(1 + \left(\frac{k}{\sigma}\right)^\ell\right)^{n-r_k}. \quad (3)$$

The claimed bound now follows because  $n - r_k \leq n$ .

Finally, the upper bound on  $r_k$  follows from the well known bound  $\binom{\sigma}{k} \leq \left(\frac{e\sigma}{k}\right)^k$ .  $\square$

## 2 Complete running time results

Here, we display all running time results on random data, which are the basis for Section 4.1 of the main manuscript. We study three different tree structures (original PCTs, and 2-GCTs,  $2^+$ -GCTs), and investigate for each of them four different algorithms (basic DP algorithm, enabled fast alphabet partitioning, enabled memoization, and complete enhanced DP algorithm).

For given alphabet size  $\sigma$  and depth  $d$ , we sample a sequence of  $N + d$  symbols from a uniform distribution, use the  $N = 100$  subsequences of length  $d + 1$  as context sequences for learning the PCT (or GCT), and measure the running time. We repeat this procedure  $10^2$  times and take the median of the obtained running times, setting a total time limit of 24 hours. Exceeding it causes the procedure to terminate, resulting in a median of all running times obtained so far.

We visualize the running times of a method using a combination of table and heat map, where the rows of the table correspond to the alphabet size  $\sigma$ , and the columns correspond to the depth  $d$  of the PCT. We display the precise median running times in the corresponding cells in seconds, and color cells with a running time of less than a second in yellow. For larger running times the cell color has an increasing content of red according to equivalence classes of problems than run below 1 minute, 1 hour, and 1 day, respectively.

The supplementary figures are related to the main manuscript as follows. Figure 1(a) and Figure 1(d) in this supplement together convey exactly the same results as Figure 4 in the main manuscript. Figure 5(a) and Figure 5(b) in the manuscript display a subset of the results from Figure 2(d) and Figure 3(d) in this supplement.

## 2.1 PCT

| $\sigma$ | 1     | 2     | 3     | 4     | 5    | 6     | 7    | 8     | 9   | 10   | 11    | 12 |
|----------|-------|-------|-------|-------|------|-------|------|-------|-----|------|-------|----|
| 3        | 0.001 | 0.002 | 0.006 | 0.032 | 0.13 | 0.68  | 4.34 | 28.5  | 189 | 1415 | 12474 |    |
| 4        | 0.001 | 0.007 | 0.050 | 0.57  | 7.72 | 108   | 1792 | 31653 |     |      |       |    |
| 5        | 0.003 | 0.038 | 0.84  | 23.1  | 714  | 28316 |      |       |     |      |       |    |
| 6        | 0.011 | 0.34  | 18.6  | 1294  |      |       |      |       |     |      |       |    |
| 7        | 0.053 | 4.71  | 644   |       |      |       |      |       |     |      |       |    |
| 8        | 0.44  | 87.4  | 31248 |       |      |       |      |       |     |      |       |    |
| 9        | 4.64  | 2020  |       |       |      |       |      |       |     |      |       |    |
| 10       | 39.3  | 51476 |       |       |      |       |      |       |     |      |       |    |
| 11       | 448   |       |       |       |      |       |      |       |     |      |       |    |
| 12       | 8428  |       |       |       |      |       |      |       |     |      |       |    |

(a) Basic DP algorithm

| $\sigma$ | 1     | 2     | 3     | 4     | 5     | 6     | 7    | 8     | 9   | 10   | 11    | 12 |
|----------|-------|-------|-------|-------|-------|-------|------|-------|-----|------|-------|----|
| 3        | 0.002 | 0.004 | 0.009 | 0.029 | 0.17  | 0.91  | 5.83 | 38.5  | 257 | 2188 | 16325 |    |
| 4        | 0.002 | 0.008 | 0.062 | 0.62  | 8.41  | 123   | 1864 | 34389 |     |      |       |    |
| 5        | 0.003 | 0.031 | 0.77  | 19.5  | 568   | 13337 |      |       |     |      |       |    |
| 6        | 0.005 | 0.12  | 6.71  | 478   | 25345 |       |      |       |     |      |       |    |
| 7        | 0.013 | 0.72  | 78.1  | 9752  |       |       |      |       |     |      |       |    |
| 8        | 0.024 | 3.71  | 926   |       |       |       |      |       |     |      |       |    |
| 9        | 0.064 | 25.2  | 15802 |       |       |       |      |       |     |      |       |    |
| 10       | 0.13  | 123   |       |       |       |       |      |       |     |      |       |    |
| 11       | 0.41  | 993   |       |       |       |       |      |       |     |      |       |    |
| 12       | 2.23  | 6477  |       |       |       |       |      |       |     |      |       |    |
| 13       | 6.23  | 46148 |       |       |       |       |      |       |     |      |       |    |
| 14       | 18.4  |       |       |       |       |       |      |       |     |      |       |    |
| 15       | 56.7  |       |       |       |       |       |      |       |     |      |       |    |
| 16       | 177   |       |       |       |       |       |      |       |     |      |       |    |
| 17       | 557   |       |       |       |       |       |      |       |     |      |       |    |
| 18       | 1810  |       |       |       |       |       |      |       |     |      |       |    |
| 19       | 5524  |       |       |       |       |       |      |       |     |      |       |    |
| 20       | 13226 |       |       |       |       |       |      |       |     |      |       |    |

(b) Fast alphabet partitioning

| $\sigma$ | 1     | 2     | 3     | 4     | 5     | 6    | 7    | 8    | 9    | 10   | 11   | 12  |
|----------|-------|-------|-------|-------|-------|------|------|------|------|------|------|-----|
| 3        | 0.001 | 0.003 | 0.009 | 0.025 | 0.134 | 0.47 | 1.74 | 4.85 | 13.8 | 40.7 | 77.5 | 345 |
| 4        | 0.001 | 0.007 | 0.052 | 0.49  | 5.11  | 34.4 | 172  | 1480 | 5002 |      |      |     |
| 5        | 0.003 | 0.044 | 0.93  | 21.1  | 301   | 3216 |      |      |      |      |      |     |
| 6        | 0.011 | 0.36  | 19.5  | 723   |       |      |      |      |      |      |      |     |
| 7        | 0.055 | 5.46  | 552   | 44303 |       |      |      |      |      |      |      |     |
| 8        | 0.44  | 83.61 | 24654 |       |       |      |      |      |      |      |      |     |
| 9        | 4.52  | 1991  |       |       |       |      |      |      |      |      |      |     |
| 10       | 41.1  | 51790 |       |       |       |      |      |      |      |      |      |     |
| 11       | 453   |       |       |       |       |      |      |      |      |      |      |     |
| 12       | 7697  |       |       |       |       |      |      |      |      |      |      |     |

(c) Memoization

| $\sigma$ | 1     | 2     | 3     | 4     | 5    | 6    | 7     | 8    | 9    | 10    | 11   | 12    |
|----------|-------|-------|-------|-------|------|------|-------|------|------|-------|------|-------|
| 3        | 0.002 | 0.003 | 0.008 | 0.025 | 0.13 | 0.56 | 2.09  | 6.89 | 18.5 | 45.2  | 99.2 | 446.5 |
| 4        | 0.002 | 0.007 | 0.046 | 0.53  | 5.55 | 38.1 | 186   | 1420 | 2479 | 11583 |      |       |
| 5        | 0.003 | 0.039 | 0.54  | 14.2  | 199  | 2605 | 17094 |      |      |       |      |       |
| 6        | 0.005 | 0.12  | 6.27  | 279   | 6420 |      |       |      |      |       |      |       |
| 7        | 0.013 | 0.66  | 70.2  | 5183  |      |      |       |      |      |       |      |       |
| 8        | 0.023 | 3.46  | 718   |       |      |      |       |      |      |       |      |       |
| 9        | 0.064 | 25.5  | 12055 |       |      |      |       |      |      |       |      |       |
| 10       | 0.14  | 126   |       |       |      |      |       |      |      |       |      |       |
| 11       | 0.41  | 704   |       |       |      |      |       |      |      |       |      |       |
| 12       | 2.27  | 5648  |       |       |      |      |       |      |      |       |      |       |
| 13       | 5.58  | 43469 |       |       |      |      |       |      |      |       |      |       |
| 14       | 16.2  |       |       |       |      |      |       |      |      |       |      |       |
| 15       | 54.4  |       |       |       |      |      |       |      |      |       |      |       |
| 16       | 161   |       |       |       |      |      |       |      |      |       |      |       |
| 17       | 539   |       |       |       |      |      |       |      |      |       |      |       |
| 18       | 1708  |       |       |       |      |      |       |      |      |       |      |       |
| 19       | 5426  |       |       |       |      |      |       |      |      |       |      |       |
| 20       | 17670 |       |       |       |      |      |       |      |      |       |      |       |
| 21       | 37083 |       |       |       |      |      |       |      |      |       |      |       |

(d) Enhanced DP algorithm

Figure 1: Running time tables for PCTs on random data.

## 2.2 2-GCT

| $\sigma$ | 1     | 2     | 3     | 4     | 5     | 6     | 7     | 8    | 9     | 10  | 11   | 12    |
|----------|-------|-------|-------|-------|-------|-------|-------|------|-------|-----|------|-------|
| 3        | 0.001 | 0.002 | 0.005 | 0.026 | 0.07  | 0.39  | 2.16  | 12.5 | 73.5  | 446 | 2727 | 16358 |
| 4        | 0.001 | 0.006 | 0.025 | 0.21  | 1.92  | 18.5  | 187   | 1905 | 18660 |     |      |       |
| 5        | 0.002 | 0.026 | 0.25  | 3.65  | 50.2  | 770   | 11611 |      |       |     |      |       |
| 6        | 0.011 | 0.14  | 2.84  | 62.0  | 1330  | 28485 |       |      |       |     |      |       |
| 7        | 0.054 | 1.46  | 39.6  | 1196  | 36147 |       |       |      |       |     |      |       |
| 8        | 0.44  | 17.0  | 648   | 23748 |       |       |       |      |       |     |      |       |
| 9        | 4.74  | 215   | 10275 |       |       |       |       |      |       |     |      |       |
| 10       | 49.2  | 2838  |       |       |       |       |       |      |       |     |      |       |
| 11       | 563   | 42828 |       |       |       |       |       |      |       |     |      |       |
| 12       | 7994  |       |       |       |       |       |       |      |       |     |      |       |

(a) Basic DP algorithm

| $\sigma$ | 1     | 2     | 3     | 4     | 5     | 6    | 7    | 8    | 9     | 10  | 11   | 12    |
|----------|-------|-------|-------|-------|-------|------|------|------|-------|-----|------|-------|
| 3        | 0.002 | 0.004 | 0.007 | 0.027 | 0.092 | 0.51 | 2.87 | 16.9 | 96.4  | 552 | 3559 | 22240 |
| 4        | 0.002 | 0.006 | 0.027 | 0.23  | 2.15  | 21.4 | 213  | 2089 | 45442 |     |      |       |
| 5        | 0.003 | 0.024 | 0.20  | 2.30  | 32.2  | 458  | 8015 |      |       |     |      |       |
| 6        | 0.005 | 0.05  | 0.90  | 18.7  | 372   | 8147 |      |      |       |     |      |       |
| 7        | 0.012 | 0.19  | 4.65  | 134   | 3791  |      |      |      |       |     |      |       |
| 8        | 0.024 | 0.70  | 24.20 | 878   | 32061 |      |      |      |       |     |      |       |
| 9        | 0.063 | 3.47  | 121   | 5688  |       |      |      |      |       |     |      |       |
| 10       | 0.16  | 9.78  | 622   | 33285 |       |      |      |      |       |     |      |       |
| 11       | 0.50  | 39.0  | 2750  |       |       |      |      |      |       |     |      |       |
| 12       | 2.25  | 152   | 11142 |       |       |      |      |      |       |     |      |       |
| 13       | 6.22  | 526   |       |       |       |      |      |      |       |     |      |       |
| 14       | 18.4  | 1877  |       |       |       |      |      |      |       |     |      |       |
| 15       | 56.7  | 6352  |       |       |       |      |      |      |       |     |      |       |
| 16       | 144   |       |       |       |       |      |      |      |       |     |      |       |
| 17       | 560   |       |       |       |       |      |      |      |       |     |      |       |
| 18       | 1833  |       |       |       |       |      |      |      |       |     |      |       |
| 19       | 5614  |       |       |       |       |      |      |      |       |     |      |       |
| 20       | 12601 |       |       |       |       |      |      |      |       |     |      |       |

(b) Fast alphabet partitioning

| $\sigma$ | 1     | 2     | 3     | 4     | 5     | 6     | 7     | 8     | 9     | 10    | 11    | 12    |
|----------|-------|-------|-------|-------|-------|-------|-------|-------|-------|-------|-------|-------|
| 3        | 0.001 | 0.002 | 0.009 | 0.026 | 0.077 | 0.212 | 0.534 | 1.20  | 1.75  | 3.20  | 4.07  | 4.63  |
| 4        | 0.001 | 0.005 | 0.12  | 0.17  | 0.84  | 2.35  | 4.19  | 6.95  | 7.23  | 9.01  | 10.1  | 11.6  |
| 5        | 0.003 | 0.032 | 0.24  | 1.81  | 6.34  | 11.8  | 18.4  | 23.2  | 28.0  | 33.0  | 40.3  | 43.8  |
| 6        | 0.011 | 0.15  | 2.39  | 19.4  | 53.4  | 87.1  | 116   | 141.4 | 163.7 | 211.8 | 183.6 | 214.4 |
| 7        | 0.054 | 1.55  | 32.4  | 205   | 449   | 677   | 875   | 1071  | 1159  | 1318  | 1453  | 1565  |
| 8        | 0.45  | 16.9  | 428   | 2236  | 4216  | 6099  | 7872  |       |       |       |       |       |
| 9        | 4.69  | 208   | 5653  | 22557 | 42885 |       |       |       |       |       |       |       |
| 10       | 49.9  | 2844  |       |       |       |       |       |       |       |       |       |       |
| 11       | 563   | 38364 |       |       |       |       |       |       |       |       |       |       |
| 12       | 7660  |       |       |       |       |       |       |       |       |       |       |       |

(c) Memoization

| $\sigma$ | 1     | 2     | 3     | 4     | 5     | 6     | 7     | 8     | 9     | 10    | 11    | 12    |
|----------|-------|-------|-------|-------|-------|-------|-------|-------|-------|-------|-------|-------|
| 3        | 0.002 | 0.004 | 0.008 | 0.029 | 0.088 | 0.316 | 0.71  | 1.47  | 2.42  | 3.71  | 4.84  | 5.93  |
| 4        | 0.002 | 0.006 | 0.028 | 0.21  | 0.96  | 2.82  | 4.73  | 6.47  | 7.10  | 8.33  | 9.94  | 12.0  |
| 5        | 0.003 | 0.032 | 0.17  | 1.30  | 5.32  | 9.98  | 12.1  | 14.1  | 16.3  | 19.0  | 20.8  | 23.2  |
| 6        | 0.005 | 0.050 | 0.78  | 8.21  | 19.0  | 29.7  | 35.3  | 43.2  | 49.8  | 56.3  | 63.4  | 69.5  |
| 7        | 0.013 | 0.18  | 4.04  | 25.6  | 52.2  | 91.6  | 112   | 134   | 129   | 147   | 194   | 210   |
| 8        | 0.023 | 0.71  | 18.6  | 81.4  | 190   | 275   | 313   | 376   | 337   | 374   | 538   | 590   |
| 9        | 0.064 | 2.77  | 78.5  | 318   | 598   | 697   | 959   | 1172  | 1370  | 1544  | 1748  | 1899  |
| 10       | 0.18  | 9.94  | 296   | 1031  | 1687  | 2351  | 2969  | 3670  | 3504  | 3958  | 4373  | 4827  |
| 11       | 0.51  | 35.8  | 1084  | 3408  | 5424  | 7545  | 10705 | 10712 | 12196 | 14226 | 16021 | 16932 |
| 12       | 2.24  | 143   | 3904  | 8905  | 16552 | 23627 | 30663 | 28676 | 34249 | 38593 | 43197 |       |
| 13       | 5.47  | 443   | 12588 | 38676 |       |       |       |       |       |       |       |       |
| 14       | 17.5  | 1774  | 46027 |       |       |       |       |       |       |       |       |       |
| 15       | 54.1  | 6261  |       |       |       |       |       |       |       |       |       |       |
| 16       | 132   | 18518 |       |       |       |       |       |       |       |       |       |       |
| 17       | 529   | 69080 |       |       |       |       |       |       |       |       |       |       |
| 18       | 1661  |       |       |       |       |       |       |       |       |       |       |       |
| 19       | 5444  |       |       |       |       |       |       |       |       |       |       |       |
| 20       | 17874 |       |       |       |       |       |       |       |       |       |       |       |
| 21       | 50107 |       |       |       |       |       |       |       |       |       |       |       |

(d) Enhanced DP algorithm

Figure 2: Running time tables for 2-GCTs on random data.

### 2.3 $2^+$ -GCT

| $\sigma$ | 1     | 2     | 3     | 4     | 5     | 6     | 7     | 8    | 9     | 10   | 11    | 12 |
|----------|-------|-------|-------|-------|-------|-------|-------|------|-------|------|-------|----|
| 3        | 0.001 | 0.002 | 0.006 | 0.032 | 0.13  | 0.86  | 5.48  | 35.8 | 244   | 1773 | 12477 |    |
| 4        | 0.001 | 0.006 | 0.032 | 0.31  | 3.19  | 35.3  | 301   | 4527 | 49466 |      |       |    |
| 5        | 0.002 | 0.028 | 0.31  | 4.80  | 77.5  | 1303  | 22301 |      |       |      |       |    |
| 6        | 0.011 | 0.152 | 3.39  | 84.1  | 2023  | 53511 |       |      |       |      |       |    |
| 7        | 0.052 | 1.53  | 47.1  | 1702  | 56750 |       |       |      |       |      |       |    |
| 8        | 0.44  | 17.3  | 775   | 32355 |       |       |       |      |       |      |       |    |
| 9        | 4.57  | 216   | 12879 |       |       |       |       |      |       |      |       |    |
| 10       | 49.1  | 2885  |       |       |       |       |       |      |       |      |       |    |
| 11       | 560   | 43273 |       |       |       |       |       |      |       |      |       |    |
| 12       | 8430  |       |       |       |       |       |       |      |       |      |       |    |

(a) Basic DP algorithm

| $\sigma$ | 1     | 2     | 3     | 4     | 5     | 6     | 7     | 8    | 9   | 10   | 11    | 12 |
|----------|-------|-------|-------|-------|-------|-------|-------|------|-----|------|-------|----|
| 3        | 0.002 | 0.004 | 0.009 | 0.03  | 0.17  | 1.14  | 7.54  | 48.3 | 320 | 2172 | 16357 |    |
| 4        | 0.002 | 0.007 | 0.035 | 0.34  | 3.58  | 39.4  | 443   | 5024 |     |      |       |    |
| 5        | 0.003 | 0.03  | 0.23  | 3.18  | 50.0  | 782   | 15403 |      |     |      |       |    |
| 6        | 0.005 | 0.054 | 1.12  | 25.1  | 566   | 14157 |       |      |     |      |       |    |
| 7        | 0.013 | 0.19  | 5.71  | 189   | 6052  |       |       |      |     |      |       |    |
| 8        | 0.023 | 0.73  | 30.3  | 1460  | 58141 |       |       |      |     |      |       |    |
| 9        | 0.065 | 3.66  | 159   | 9809  |       |       |       |      |     |      |       |    |
| 10       | 0.16  | 9.99  | 840   | 56938 |       |       |       |      |     |      |       |    |
| 11       | 0.51  | 39.3  | 4109  |       |       |       |       |      |     |      |       |    |
| 12       | 2.29  | 154   | 19502 |       |       |       |       |      |     |      |       |    |
| 13       | 6.27  | 529   |       |       |       |       |       |      |     |      |       |    |
| 14       | 18.4  | 1896  |       |       |       |       |       |      |     |      |       |    |
| 15       | 56.7  | 6734  |       |       |       |       |       |      |     |      |       |    |
| 16       | 175   |       |       |       |       |       |       |      |     |      |       |    |
| 17       | 571   |       |       |       |       |       |       |      |     |      |       |    |
| 18       | 1824  |       |       |       |       |       |       |      |     |      |       |    |
| 19       | 5595  |       |       |       |       |       |       |      |     |      |       |    |
| 20       | 11927 |       |       |       |       |       |       |      |     |      |       |    |

(b) Fast alphabet partitioning

| $\sigma$ | 1     | 2     | 3     | 4     | 5     | 6     | 7     | 8    | 9    | 10    | 11   | 12   |
|----------|-------|-------|-------|-------|-------|-------|-------|------|------|-------|------|------|
| 3        | 0.001 | 0.002 | 0.008 | 0.033 | 0.13  | 0.57  | 2.09  | 6.53 | 16.3 | 49.1  | 100  | 399  |
| 4        | 0.001 | 0.006 | 0.049 | 0.25  | 1.53  | 8.61  | 30.7  | 111  | 286  | 1051  | 1503 | 4483 |
| 5        | 0.002 | 0.032 | 0.29  | 2.70  | 15.5  | 65.4  | 254.6 | 1353 | 3672 | 16975 |      |      |
| 6        | 0.011 | 0.16  | 2.91  | 32.0  | 197   | 1203  | 4124  |      |      |       |      |      |
| 7        | 0.054 | 1.59  | 39.3  | 480   | 3250  | 23633 |       |      |      |       |      |      |
| 8        | 0.44  | 17.3  | 542.2 | 7495  | 50187 |       |       |      |      |       |      |      |
| 9        | 4.68  | 211   | 7942  |       |       |       |       |      |      |       |      |      |
| 10       | 50.4  | 2904  |       |       |       |       |       |      |      |       |      |      |
| 11       | 565   | 39027 |       |       |       |       |       |      |      |       |      |      |
| 12       | 7913  |       |       |       |       |       |       |      |      |       |      |      |

(c) Memoization

| $\sigma$ | 1     | 2     | 3     | 4     | 5     | 6     | 7     | 8    | 9    | 10    | 11   | 12   |
|----------|-------|-------|-------|-------|-------|-------|-------|------|------|-------|------|------|
| 3        | 0.002 | 0.004 | 0.009 | 0.03  | 0.16  | 0.596 | 2.28  | 6.96 | 18.4 | 55.2  | 117  | 526  |
| 4        | 0.002 | 0.007 | 0.034 | 0.30  | 1.97  | 8.23  | 32.6  | 113  | 326  | 1127  | 1924 | 5735 |
| 5        | 0.003 | 0.026 | 0.21  | 1.96  | 13.2  | 52.8  | 209   | 1043 | 2284 | 11315 |      |      |
| 6        | 0.005 | 0.054 | 0.95  | 12.5  | 67.2  | 454   | 1762  | 7058 |      |       |      |      |
| 7        | 0.013 | 0.19  | 4.84  | 62.8  | 423   | 3244  | 13125 |      |      |       |      |      |
| 8        | 0.024 | 0.73  | 23.7  | 325   | 2515  | 28448 |       |      |      |       |      |      |
| 9        | 0.064 | 2.89  | 103   | 1507  | 19308 |       |       |      |      |       |      |      |
| 10       | 0.17  | 10.1  | 464   | 9396  |       |       |       |      |      |       |      |      |
| 11       | 0.51  | 36.3  | 2206  | 45451 |       |       |       |      |      |       |      |      |
| 12       | 2.29  | 143.2 | 10537 |       |       |       |       |      |      |       |      |      |
| 13       | 5.63  | 461   | 47343 |       |       |       |       |      |      |       |      |      |
| 14       | 17.9  | 1807  |       |       |       |       |       |      |      |       |      |      |
| 15       | 54.4  | 6330  |       |       |       |       |       |      |      |       |      |      |
| 16       | 161   | 20074 |       |       |       |       |       |      |      |       |      |      |
| 17       | 533   | 63917 |       |       |       |       |       |      |      |       |      |      |
| 18       | 1726  |       |       |       |       |       |       |      |      |       |      |      |
| 19       | 5374  |       |       |       |       |       |       |      |      |       |      |      |
| 20       | 17659 |       |       |       |       |       |       |      |      |       |      |      |
| 21       | 38454 |       |       |       |       |       |       |      |      |       |      |      |

(d) Enhanced DP algorithm

Figure 3: Running time tables for  $2^+$ -GCTs on random data.

### 3 Complete memoization results on protein data

We study several well-known proteins of different size and functionality, and extract their sequence from the protein sequence database UniProt [1]: human hormone insulin (Uniprot ID P01308, 110 amino acid residues), plant photosynthesis key enzyme RuBisCO (003042, 479 residues), human oxygen-binding proteins myoglobin (P02144, 154 residues) and hemoglobin subunit  $\alpha$  (abbreviated HG  $\alpha$ , P69905, 142 residues), human cytoskeleton protein actin (P68133, 377 residues), and the green fluorescent protein (abbreviated GFP, P42212, 238 residues) from jellyfish. For the representation of these data sets, we use a reduced amino acid alphabet according to the reduction method of Li et al. [2], which offers each desired reduced alphabet size an optimal clustering of amino acids into groups.

We show the effect of memoization w.r.t. the number of visited nodes in the extended tree for computing 2-GCTs, 2<sup>+</sup>-GCTs, and original PCTs. In the following (Table 3, Table 5, and Table 1), we show for each of the three structures the results for several non-trivial combinations of alphabet size  $\sigma$  and depth  $d$ . For each pair  $(\sigma, d)$ , we show the maximal number of nodes in the extended PCT/GCT that have to be visited when memoization is disabled. We then display the fraction of that maximal number that has to be visited when memoization is enabled for the six real world data sets under consideration and random data.

In addition, we also show the raw running times of all combinations of model and data set (Table 4, Table 6, and Table 2) However, since it is here often impossible to solve the problem without memoization at all, the comparison is limited to the running time result on random data from Section 2.

#### 3.1 PCT

Table 1: Number of visited nodes with memoization on original PCTs on protein data.

| $\sigma$ | $d$ | Memoization disabled | Random | RuBisCO | Insulin | Myoglobin | GFP    | Actin   | HG $\alpha$ |
|----------|-----|----------------------|--------|---------|---------|-----------|--------|---------|-------------|
| 7        | 3   | $2.06 \times 10^6$   | 93.25% | 100.00% | 92.97%  | 87.06%    | 94.70% | 100.00% | 89.14%      |
| 8        | 3   | $1.66 \times 10^7$   | 90.74% | 100.00% | 93.75%  | 84.09%    | 93.39% | 99.22%  | 89.54%      |
| 9        | 3   | $1.34 \times 10^8$   | 82.82% | 100.00% | 92.60%  | 87.90%    | 94.71% | 99.61%  | 88.87%      |
| 5        | 4   | $9.54 \times 10^5$   | 74.42% | 96.67%  | 65.78%  | 77.95%    | 81.57% | 89.55%  | 65.15%      |
| 6        | 4   | $1.60 \times 10^7$   | 62.70% | 92.73%  | 50.41%  | 49.68%    | 65.62% | 82.18%  | 55.49%      |
| 7        | 4   | $2.62 \times 10^8$   | 52.36% | 92.15%  | 43.86%  | 51.80%    | 68.02% | 85.15%  | 48.28%      |
| 5        | 5   | $2.96 \times 10^7$   | 34.45% | 80.17%  | 28.41%  | 40.69%    | 53.46% | 64.36%  | 29.90%      |

Table 2: Running times with memoization on original PCTs on protein data.

| $\sigma$ | $d$ | Random | RuBisCO | Insulin | Myoglobin | GFP  | Actin | HG $\alpha$ |
|----------|-----|--------|---------|---------|-----------|------|-------|-------------|
| 7        | 3   | 70     | 75      | 48      | 47        | 56   | 67    | 47          |
| 8        | 3   | 718    | 1086    | 794     | 764       | 927  | 1021  | 822         |
| 9        | 3   | 12055  | 9398    | 7504    | 7445      | 8260 | 9518  | 7935        |
| 5        | 4   | 14     | 26      | 12      | 14        | 18   | 22    | 13          |
| 6        | 4   | 279    | 492     | 206     | 218       | 317  | 424   | 242         |
| 7        | 4   | 5183   | 7902    | 3265    | 3943      | 5335 | 7051  | 3641        |
| 5        | 5   | 199    | 541     | 157     | 220       | 332  | 420   | 172         |

### 3.2 2-GCT

Table 3: Number of visited nodes with memoization on 2-GCTs on protein data.

| $\sigma$ | $d$ | Memoization disabled  | Random | RuBisCO | Insulin | Myoglobin | GFP    | Actin   | HG $\alpha$ |
|----------|-----|-----------------------|--------|---------|---------|-----------|--------|---------|-------------|
| 11       | 5   | $1.27 \times 10^9$    | 0.567% | 35.020% | 2.053%  | 4.247%    | 9.520% | 22.125% | 3.539%      |
| 10       | 6   | $2.82 \times 10^{10}$ | 0.056% | 1.226%  | 0.067%  | 0.131%    | 0.301% | 0.765%  | 0.111%      |
| 7        | 7   | $1.40 \times 10^{10}$ | 0.018% | 0.432%  | 0.022%  | 0.044%    | 0.105% | 0.273%  | 0.036%      |
| 5        | 8   | $2.75 \times 10^9$    | 0.028% | 0.816%  | 0.035%  | 0.078%    | 0.181% | 0.487%  | 0.062%      |
| 6        | 8   | $3.97 \times 10^{10}$ | 0.004% | 0.109%  | 0.005%  | 0.010%    | 0.025% | 0.067%  | 0.009%      |
| 5        | 9   | $4.12 \times 10^{10}$ | 0.002% | 0.076%  | 0.003%  | 0.006%    | 0.016% | 0.046%  | 0.005%      |

Table 4: Running times in seconds with memoization on 2-GCTs on protein data.

| $\sigma$ | $d$ | Random | RuBisCO | Insulin | Myoglobin | GFP   | Actin | HG $\alpha$ |
|----------|-----|--------|---------|---------|-----------|-------|-------|-------------|
| 11       | 5   | 5425   | 56057   | 3578    | 7425      | 15767 | 35823 | 6208        |
| 10       | 6   | 2351   | 32800   | 1865    | 3609      | 8500  | 20503 | 2975        |
| 7        | 7   | 112    | 2456    | 85      | 190       | 464   | 1495  | 159         |
| 5        | 8   | 14     | 594     | 21      | 55        | 120   | 325   | 38          |
| 6        | 8   | 43     | 1484    | 56      | 117       | 286   | 858   | 102         |
| 5        | 9   | 16     | 957     | 31      | 66        | 148   | 485   | 55          |

### 3.3 2<sup>+</sup>-GCT

Table 5: Number of visited nodes with memoization on 2<sup>+</sup>-GCTs on protein data.

| $\sigma$ | $d$ | Memoization disabled | Random | RuBisCO | Insulin | Myoglobin | GFP    | Actin  | HG $\alpha$ |
|----------|-----|----------------------|--------|---------|---------|-----------|--------|--------|-------------|
| 12       | 3   | $4.26 \times 10^7$   | 63.10% | 93.48%  | 59.76%  | 66.94%    | 77.73% | 86.59% | 63.41%      |
| 7        | 4   | $4.04 \times 10^6$   | 33.55% | 76.60%  | 31.04%  | 38.10%    | 51.59% | 66.08% | 34.43%      |
| 8        | 4   | $1.78 \times 10^7$   | 26.12% | 70.85%  | 26.48%  | 31.43%    | 41.51% | 60.45% | 31.49%      |
| 10       | 4   | $2.99 \times 10^9$   | 18.94% | 62.86%  | 18.29%  | 28.91%    | 37.74% | 53.58% | 27.74%      |
| 6        | 5   | $2.00 \times 10^8$   | 12.79% | 43.25%  | 10.91%  | 13.11%    | 22.00% | 31.91% | 14.00%      |
| 8        | 5   | $7.51 \times 10^9$   | 4.21%  | 27.87%  | 4.88%   | 7.21%     | 11.66% | 21.61% | 6.83%       |
| 6        | 6   | $4.74 \times 10^9$   | 2.68%  | 15.53%  | 2.35%   | 3.18%     | 6.39%  | 10.83% | 3.18%       |
| 5        | 7   | $7.57 \times 10^9$   | 1.40%  | 12.74%  | 1.39%   | 2.56%     | 4.89%  | 8.25%  | 1.82%       |
| 4        | 8   | $3.97 \times 10^9$   | 1.54%  | 13.80%  | 1.73%   | 2.59%     | 5.77%  | 10.38% | 2.29%       |

Table 6: Running times with memoization on 2<sup>+</sup>-GCTs on protein data.

| $\sigma$ | $d$ | Random | RuBisCO | Insulin | Myoglobin | GFP   | Actin | HG $\alpha$ |
|----------|-----|--------|---------|---------|-----------|-------|-------|-------------|
| 12       | 3   | 10537  | 10523   | 6920    | 7475      | 8902  | 9771  | 7292        |
| 7        | 4   | 63     | 114     | 41      | 50        | 74    | 102   | 46          |
| 8        | 4   | 325    | 652     | 227     | 270       | 359   | 577   | 259         |
| 10       | 4   | 9396   | 17481   | 5711    | 8755      | 11081 | 15017 | 8418        |
| 6        | 5   | 67     | 231     | 58      | 68        | 116   | 173   | 70          |
| 8        | 5   | 25145  | 9635    | 1702    | 2556      | 4054  | 7747  | 2465        |
| 6        | 6   | 454    | 1771    | 244     | 327       | 681   | 1235  | 322         |
| 5        | 7   | 209    | 1744    | 164     | 298       | 616   | 1164  | 227         |
| 4        | 8   | 113    | 934     | 85      | 138       | 310   | 669   | 114         |



## 4 Complete prediction results

For the comparison of different types of context trees w.r.t. their predictive performance, we use inhomogeneous PMMs and adopt a hyperparameter-free learning scheme [3], that is, BIC [4] as structure score and fsNML [5] as parameter estimation method. As data sets, we use the CEBP data set of a previously publication [6], for which PCTs have been demonstrated to predict better than CTs, and four additional data sets from the JASPAR database [7], namely DAF-12 from *C. elegans*, BZR1 and PIL5 from *A. thaliana*, and human NR2C2. For all data sets, all structural variants, and different maximal depths  $d = 1, \dots, 7$  we compare the prediction performance using leave-one-out cross validation, and we also include the simple independence model in the comparison. We plot the mean log predictive probability in Figure 4. Error bars indicate double standard error.

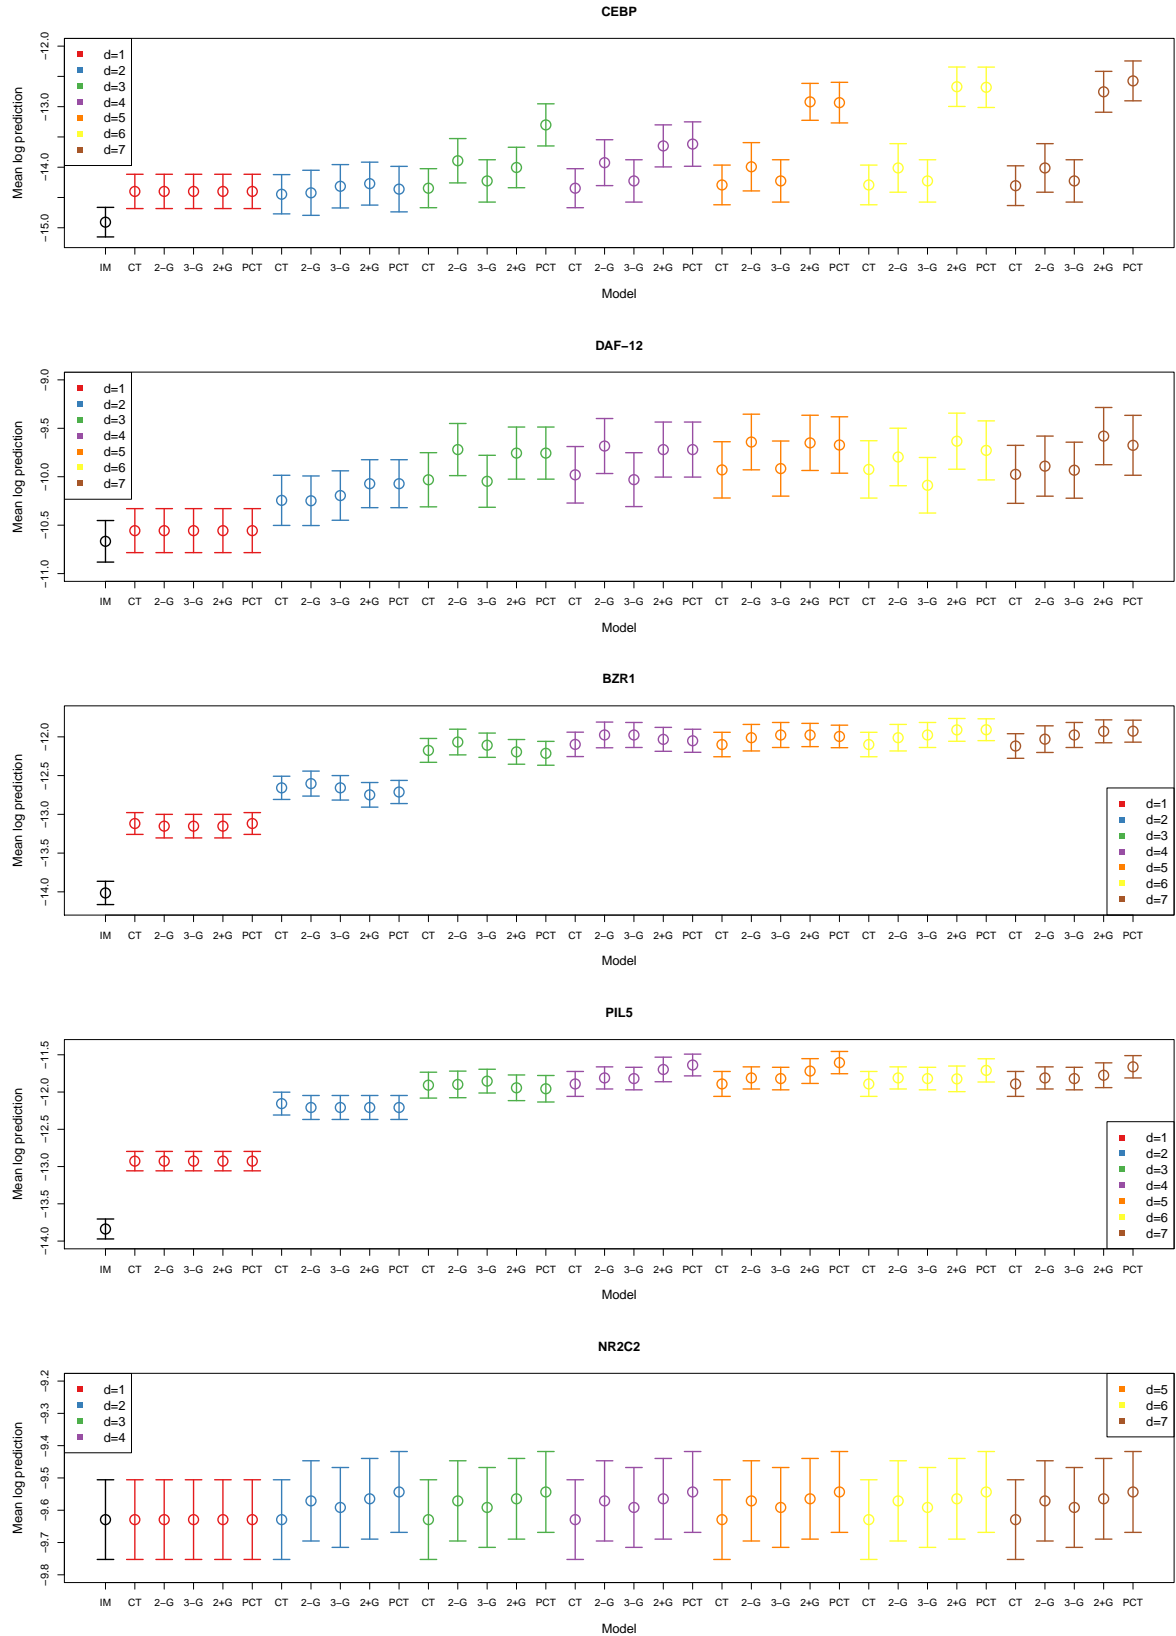

Figure 4: Complete prediction results for five data sets, five different types of context trees (with 2-G, 3-G, and 2+G being abbreviations for 2-GCTs, 3-GCTs, and 2<sup>+</sup>-GCTs), and seven different maximal tree depths, supplemented by the result of the plain independence model (IM).

## References

- [1] The UniProt Consortium. Update on activities at the Universal Protein Resource (UniProt) in 2013. *Nucleic Acids Research*, 41:D43–D47, 2013.
- [2] T. Li, K. Fan, J. Wang, and W. Wang. Reduction of protein sequence complexity by residue grouping. *Protein Engineering*, 16:323–330, 2003.
- [3] R. Eggeling, T. Roos, P. Myllymäki, and I. Grosse. Robust learning of inhomogeneous PMMs. In *Proc. AISTATS*, volume 33 of *JMLR: W&CP*, pages 229–237, 2014.
- [4] G. E. Schwarz. Estimating the dimension of a model. *Annals of Statistics*, 2:461–464, 1978.
- [5] T. Silander, T. Roos, and P. Myllymäki. Locally minimax optimal predictive modeling with Bayesian networks. In *Proc. AISTATS*, volume 5 of *JMLR: W&CP*, pages 504–511, 2009.
- [6] R. Eggeling, A. Gohr, P.-Y. Bourguignon, E. Wingender, and I. Grosse. Inhomogeneous parsimonious Markov models. In *Proc. ECMLPKDD*, volume 1, pages 321–336. Springer, 2013.
- [7] A. Sandelin, W. Alkema, P. Engström, W.W. Wasserman, and B. Lenhard. JASPAR: an open-access database for eukaryotic transcription factor binding profiles. *Nucleic Acids Research*, 32:D91–D94, 2004.
